# Supplementary material
Source: PubMed Central journal article supplement (PMC6204680)
Supplement: zjm999096129s1.pdf [file zjm999096129s1.pdf]

Table S1.

Results of IFN- $\gamma$  values in discordant results between QFT-GIT and QFT-Plus (n=20)

| QFT-GIT/Plus   | No. of cases (%) | Group         | Diagnosis                          | Concentration of IFN- $\gamma$ , IU/mL |               |               |
|----------------|------------------|---------------|------------------------------------|----------------------------------------|---------------|---------------|
|                |                  |               |                                    | QFT-GIT                                | QFT-Plus      | QFT-Plus      |
|                |                  |               |                                    | TB minus Nil                           | TB1 minus Nil | TB2 minus Nil |
| R/NR           | 11 (55.0)        |               |                                    |                                        |               |               |
|                |                  | SOT           | Autoimmune hepatitis               | <b>0.40</b>                            | 0.19          | 0.14          |
|                |                  | SOT           | decompensated ALC                  | <b>0.40</b>                            | 0.27          | 0.29          |
|                |                  | SOT           | decompensated ALC                  | <b>0.41</b>                            | 0.24          | 0.28          |
|                |                  | SOT           | DCMP                               | <b>0.42</b>                            | 0.19          | 0.27          |
|                |                  | SOT           | ADPCK                              | <b>0.43</b>                            | 0.22          | 0.28          |
|                |                  | HSCT          | MM                                 | <b>0.48</b>                            | 0.17          | 0.27          |
|                |                  | SOT           | CKD                                | <b>0.55</b>                            | 0.02          | 0.01          |
|                |                  | HSCT          | MM                                 | <b>0.73</b>                            | 0.10          | 0.27          |
|                |                  | SOT           | CKD                                | <b>0.74</b>                            | 0.13          | 0.16          |
|                |                  | SOT           | ADPCK                              | <b>0.92</b>                            | 0.24          | 0.12          |
|                |                  | TNF- $\alpha$ | Ulcerative colitis                 | <b>1.10</b>                            | 0.28          | 0.29          |
| NR/R(TB1+TB2+) | 3 (15.0)         |               |                                    |                                        |               |               |
|                |                  | SOT           | Effusive constrictive pericarditis | 0.02                                   | <b>0.37</b>   | <b>0.44</b>   |
|                |                  | SOT           | CKD                                | 0.09                                   | <b>0.69</b>   | <b>1.06</b>   |
|                |                  | SOT           | CKD                                | 0.19                                   | <b>0.43</b>   | <b>0.42</b>   |
| NR/R(TB1-TB2+) | 4 (20.0)         |               |                                    |                                        |               |               |
|                |                  | SOT           | Type 1 DM                          | 0.00                                   | 0.01          | <b>0.52</b>   |
|                |                  | SOT           | CKD                                | 0.03                                   | 0.02          | <b>2.97</b>   |
|                |                  | SOT           | Autoimmune hepatitis               | 0.15                                   | 0.13          | <b>1.01</b>   |
|                |                  | SOT           | CKD                                | 0.28                                   | 0.32          | <b>0.39</b>   |
| I/NR*          | 1 (5.0)          | HSCT          | B-ALL                              | -                                      | -             | -             |
| NR/I*          | 1 (5.0)          | SOT           | Alcoholic hepatitis                | -                                      | -             | -             |

\*Concentration of IFN- $\gamma$  of Mitogen minus Nil was 0.49 IU/mL in I/NR and 0.17 IU/mL in NR/I, respectively.

Abbreviation: QFT-GIT, QuantiFERON-TB Gold In-Tube; QFT-Plus, QuantiFERON-TB Gold Plus; IFN- $\gamma$ , interferon-gamma; R, reactive; NR, non-reactive; I, indeterminate; SOT, solid organ transplantation; HSCT, hematopoietic stem cell transplantation; TNF- $\alpha$ , tumor necrosis factor-alpha; ALC, alcoholic liver cirrhosis; DCMP, dilated cardiomyopathy; ADPCK, autosomal dominant polycystic kidney disease; MM, multiple myeloma; CKD, chronic kidney disease; DM, diabetes mellitus; B-ALL, B-cell acute lymphoblastic leukemia

Table S2.

The results IFN- $\gamma$  response performed at different time point in same individuals.

| Case      | QFT-GIT (IU/mL)    |                    | QFT-Plus (IU/mL)    |                     |                     |                     | Time to re-test (days) |
|-----------|--------------------|--------------------|---------------------|---------------------|---------------------|---------------------|------------------------|
|           | 1 <sup>st</sup> TB | 2 <sup>nd</sup> TB | 1 <sup>st</sup> TB1 | 2 <sup>nd</sup> TB1 | 1 <sup>st</sup> TB2 | 2 <sup>nd</sup> TB2 |                        |
| 1         | 0.00               | 0.00               | 0.00                | -0.01               | 0.01                | -0.01               | 3                      |
| 2         | 0.03               | 0.06               | 0.05                | 0.03                | 0.05                | 0.03                | 29                     |
| 3         | $\geq 10$          | $\geq 10$          | 2.70                | $\geq 10$           | 2.29                | $\geq 10$           | 32                     |
| 4         | 8.62               | 9.45               | $\geq 10$           | 6.89                | $\geq 10$           | 8.41                | 62                     |
| 5         | 0.03               | 0.09               | 0.10                | 0.04                | 0.03                | 0.08                | 64                     |
| 6         | 0.03               | 0.02               | 0.00                | 0.01                | 0.04                | 0.08                | 64                     |
| <b>7</b>  | 0.03               | <b>0.38</b>        | 0.12                | 0.24                | 0.03                | 0.28                | 92                     |
| 8         | 0.02               | 0.00               | -0.01               | 0.00                | 0.03                | 0.26                | 96                     |
| 9         | -0.01              | 0.00               | -0.02               | -0.03               | 0.07                | 0.00                | 114                    |
| 10        | 0.01               | 0.00               | 0.02                | -0.02               | 0.03                | -0.02               | 161                    |
| 11        | 0.25               | 0.10               | 0.28                | 0.11                | 0.22                | 0.14                | 16                     |
| 12        | 0.00               | 0.00               | 0.00                | 0.00                | 0.00                | 0.00                | 16                     |
| <b>13</b> | <b>0.39</b>        | <b>0.74</b>        | 0.19                | <b>0.59</b>         | 0.26                | <b>0.59</b>         | 10                     |
| 14        | 0.03               | 0.00               | 0.02                | 0.01                | 0.00                | 0.00                | 15                     |
| 15        | 0.80               | 0.70               | 0.83                | 0.99                | 0.90                | 0.73                | 17                     |
| 16        | 0.00               | 0.04               | 0.01                | 0.05                | 0.02                | 0.00                | 7                      |
| 17        | 0.00               | 0.00               | 0.00                | 0.02                | 0.00                | 0.02                | 33                     |
| 18        | 0.02               | 0.05               | 0.00                | 0.02                | 0.00                | 0.01                | 31                     |
| 19        | 0.01               | 0.01               | 0.00                | 0.01                | 0.03                | 0.01                | 14                     |
| 20        | 4.76               | 2.02               | 4.09                | 2.16                | 3.08                | 2.09                | 20                     |
| 21        | 0.02               | 0.06               | 0.06                | 0.03                | 0.03                | 0.03                | 5                      |
| 22        | 0.01               | 0.00               | 0.05                | 0.00                | 0.00                | 0.00                | 27                     |
| 23        | 0.00               | 0.05               | 0.00                | 0.09                | 0.00                | 0.16                | 15                     |
| 24        | 0.61               | 2.53               | 0.91                | 1.09                | 1.00                | 1.58                | 34                     |
| 25        | 0.00               | 0.00               | 0.00                | 0.01                | 0.03                | 0.00                | 35                     |
| 26        | 5.52               | $\geq 10$          | 5.22                | $\geq 10$           | 6.57                | $\geq 10$           | 15                     |
| 27        | 3.08               | $\geq 10$          | 3.03                | $\geq 10$           | 3.40                | $\geq 10$           | 14                     |
| <b>28</b> | 0.02               | <b>2.01</b>        | 0.00                | <b>1.35</b>         | 0.02                | <b>1.56</b>         | 23                     |
| 29        | $\geq 10$          | $\geq 10$          | $\geq 10$           | 8.77                | $\geq 10$           | 7.76                | 17                     |
| 30        | 0.01               | 0.03               | 0.01                | 0.03                | 0.00                | 0.02                | 36                     |
| 31        | 2.26               | 9.30               | 3.01                | 2.82                | 2.58                | 2.50                | 23                     |
| 32        | 0.00               | 0.00               | 0.00                | 0.00                | 0.00                | 0.00                | 31                     |
| 33        | 0.73               | 0.68               | 0.62                | 0.40                | 0.45                | 0.49                | 17                     |
| 34        | 0.00               | 0.01               | 0.00                | 0.00                | 0.00                | 0.00                | 25                     |
| 35        | 6.93               | $\geq 10$          | 6.37                | 5.66                | 8.61                | 5.02                | 10                     |
| 36        | 0.00               | 0.00               | 0.00                | 0.01                | 0.00                | 0.00                | 31                     |
| 37        | 0.00               | 0.00               | 0.00                | 0.00                | 0.15                | 0.08                | 12                     |

All IFN- $\gamma$  values are derived from antigen minus Nil.

Abbreviation: QFT-GIT, QuantiFERON-TB Gold In-Tube; QFT-Plus, QuantiFERON-TB Gold Plus
