# Supplementary material
Source: PubMed Central journal article supplement (PMC6204680)
Supplement: zjm999096129s3.pdf [file zjm999096129s3.pdf]

FIG S1. Correlations between IFN- $\gamma$  responses in different tuberculosis antigens among SOT, HSCT, and TNF- $\alpha$  inhibitor therapy groups. In SOT group, QFT-GIT TB versus QFT-Plus TB1 (A); QFT-GIT TB versus QFT-Plus TB2 (D); QFT-Plus TB1 versus QFT-Plus TB2 (G) In HSCT group, QFT-GIT TB versus QFT-Plus TB1 (B); QFT-GIT TB versus QFT-Plus TB2 (E); QFT-Plus TB1 versus QFT-Plus TB2 (H). In TNF- $\alpha$  inhibitor therapy group, QFT-GIT TB versus QFT-Plus TB1 (C); QFT-GIT TB versus QFT-Plus TB2 (F); QFT-Plus TB1 versus QFT-Plus TB2 (I). Abbreviation: SOT, solid organ transplantation; HSCT, hematopoietic stem cell transplantation; TNF- $\alpha$ , tumor necrosis factor-alpha
