# Supplementary material
Source: PubMed Central journal article supplement (PMC6204680)

# Figure S1

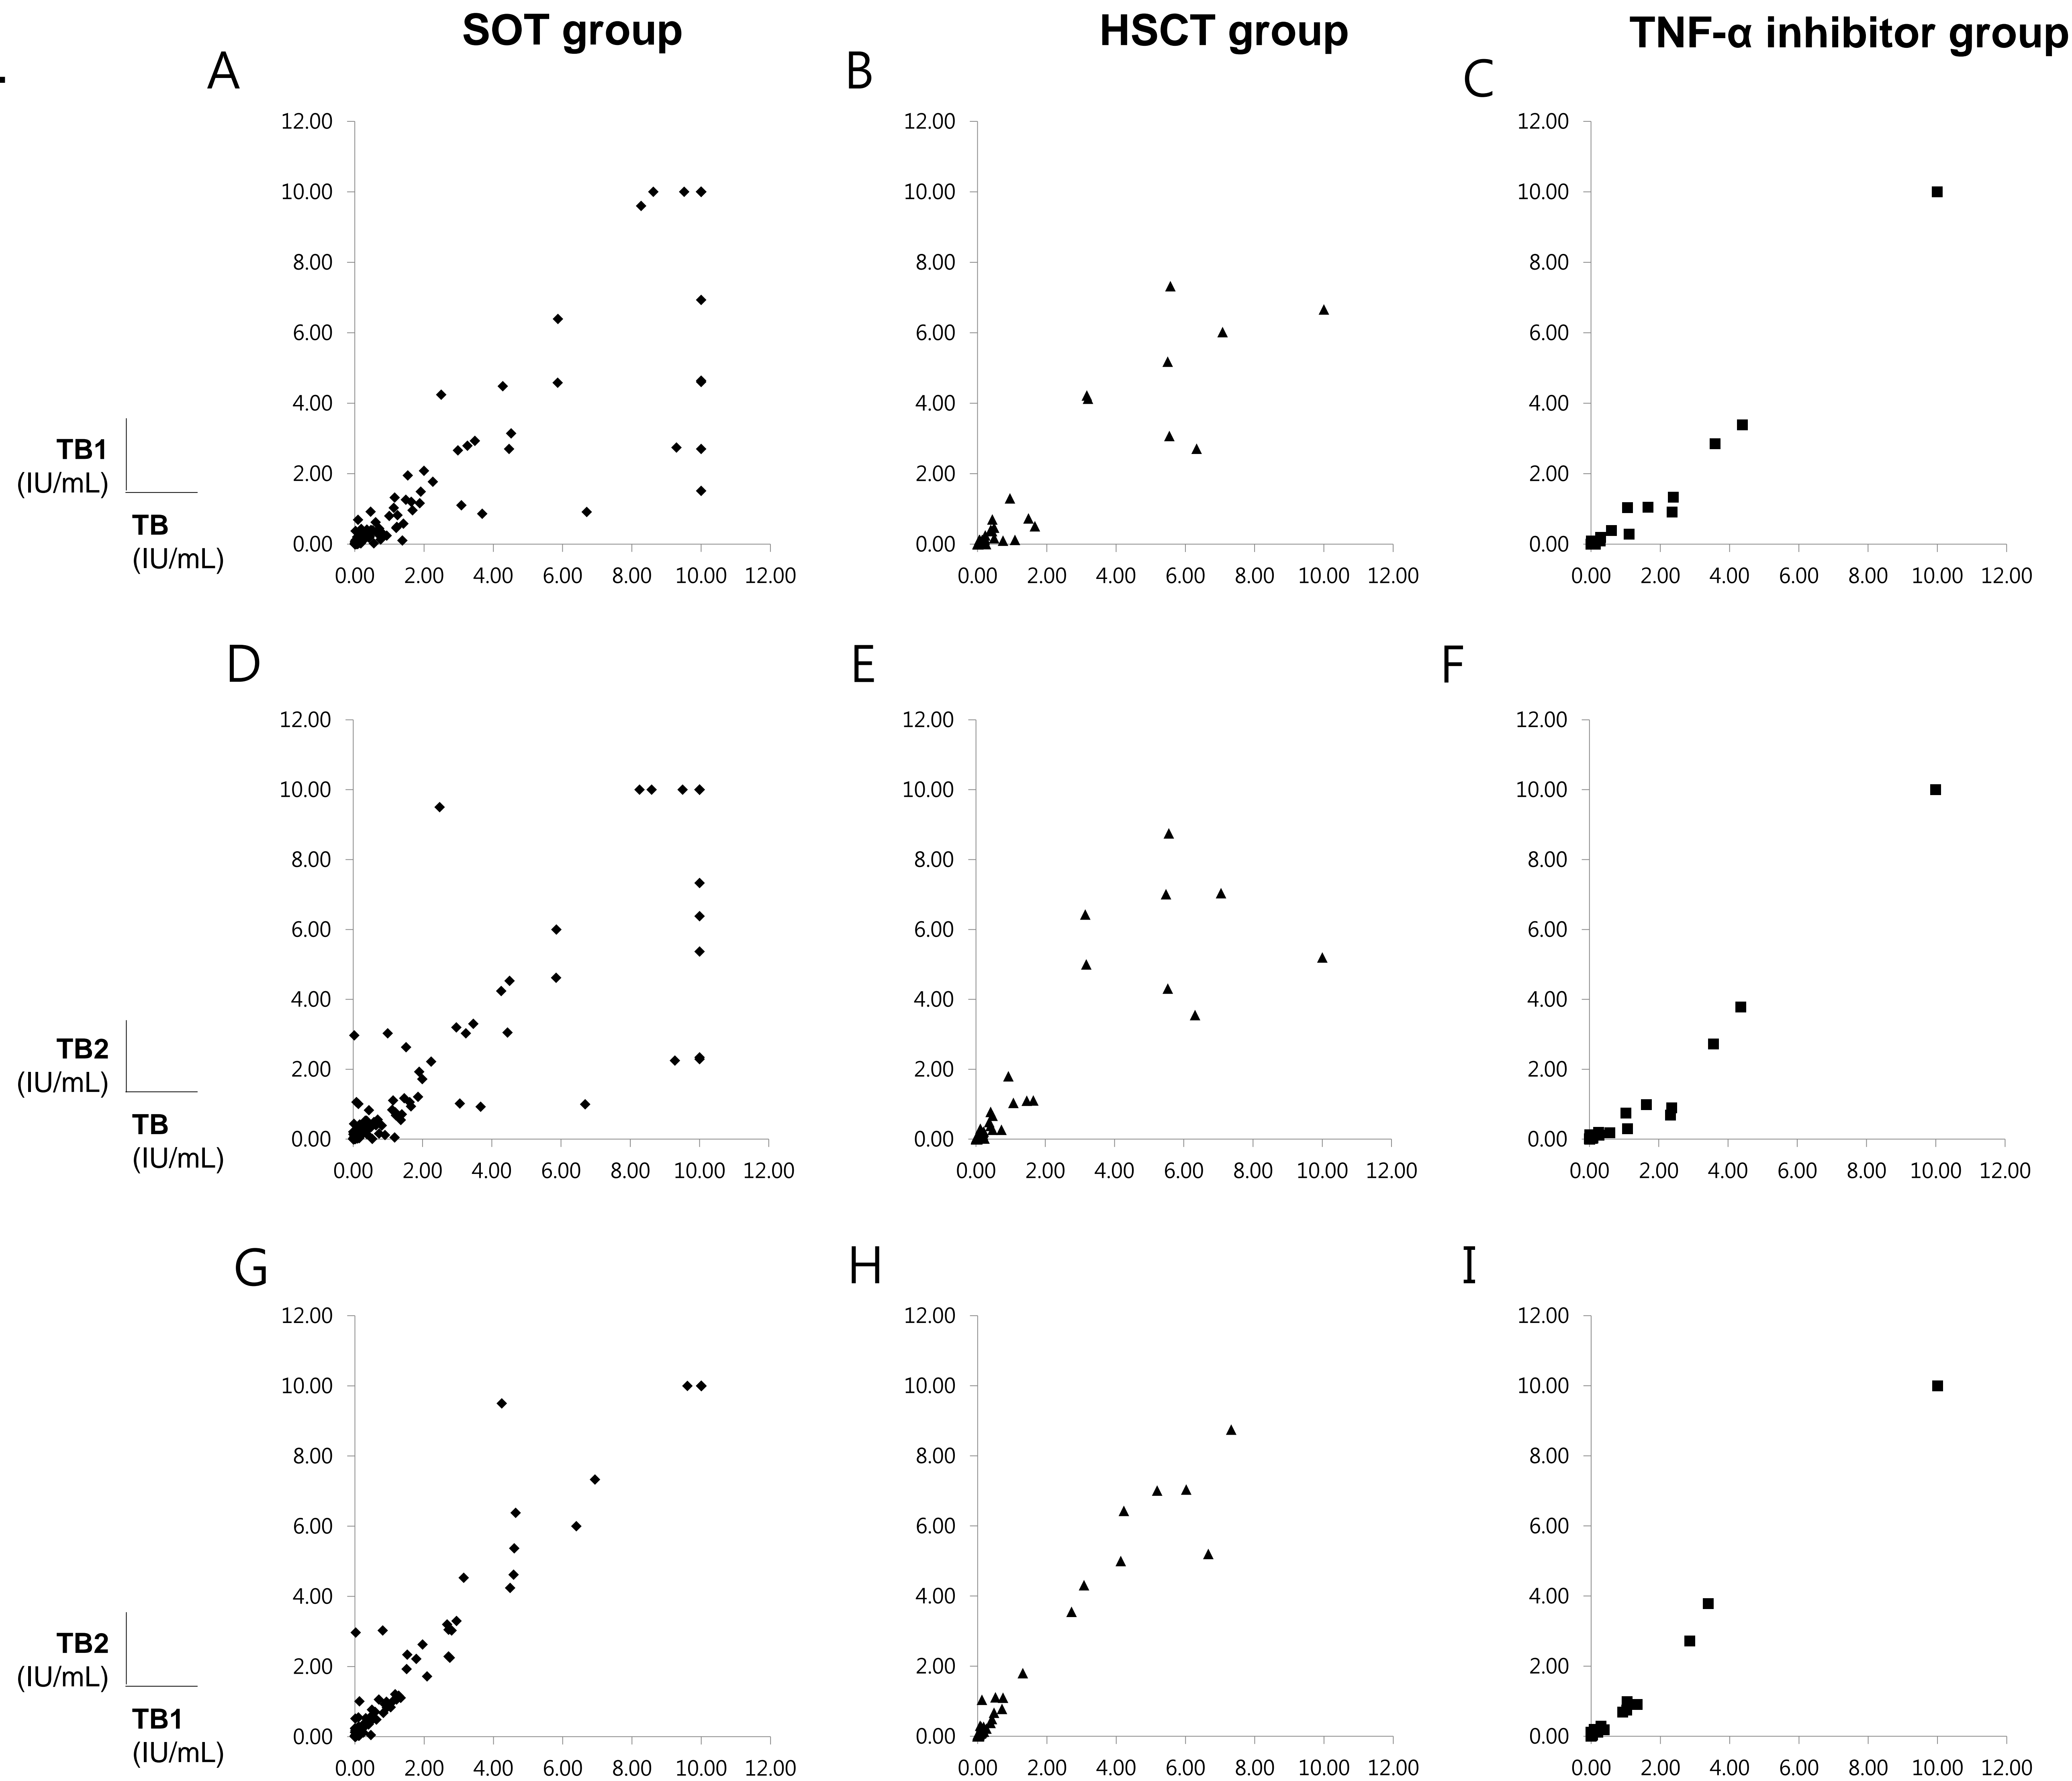

Supplement: zjm999096129s2.pdf [file zjm999096129s2.pdf]
